# Supplementary material
Source: PubMed Central journal article supplement (PMC5953207)
Supplement: NIHMS964729-supplement-1.pdf [file NIHMS964729-supplement-1.pdf]

## Supplementary Information

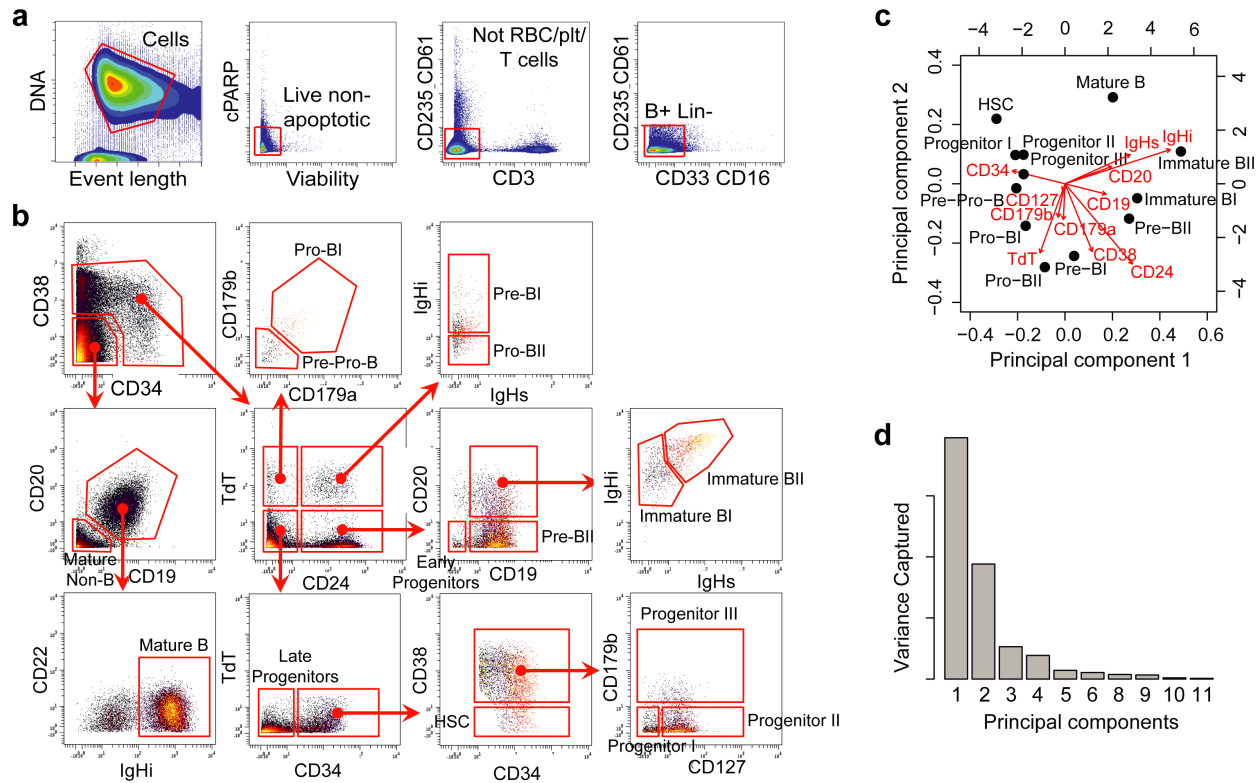

**Supplementary Figure 1. Gating strategy for leukemic blasts and normal developing B cells.** **(a)** Gating strategy for lineage-negative blasts ( $B^+ Lin^-$  cells), the starting population for all subsequent analyses of normal and leukemic samples. Mass cytometry results from a representative (of  $n = 5$ ) lineage-depleted healthy donor bone marrow aspirate are shown. **(b)** Gating strategy to identify 12 subpopulations of B lymphopoiesis and 3 non-B populations among  $B^+ Lin^-$  cells from (a). **(c)** Principle component analysis (PCA) supplement for healthy populations from 5 healthy bone marrow donors shown in Figure 1c. Arrows indicate protein vectors defining the PCA space. **(d)** Bar plot demonstrating how much variance is captured by each principal component in (c).

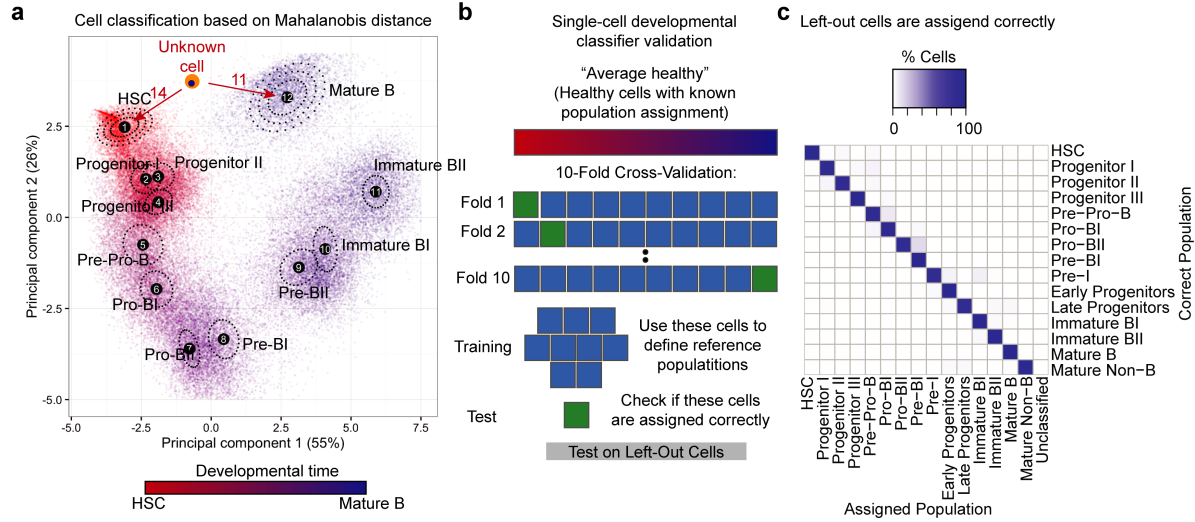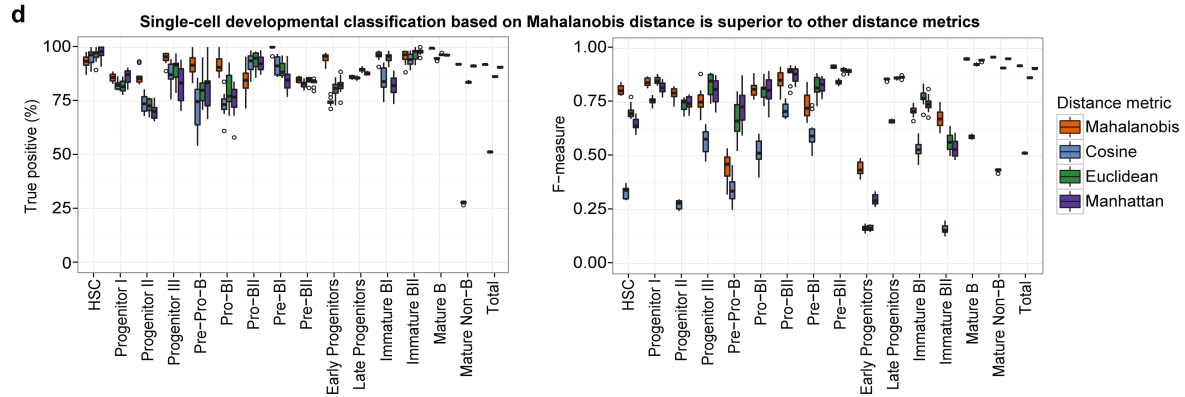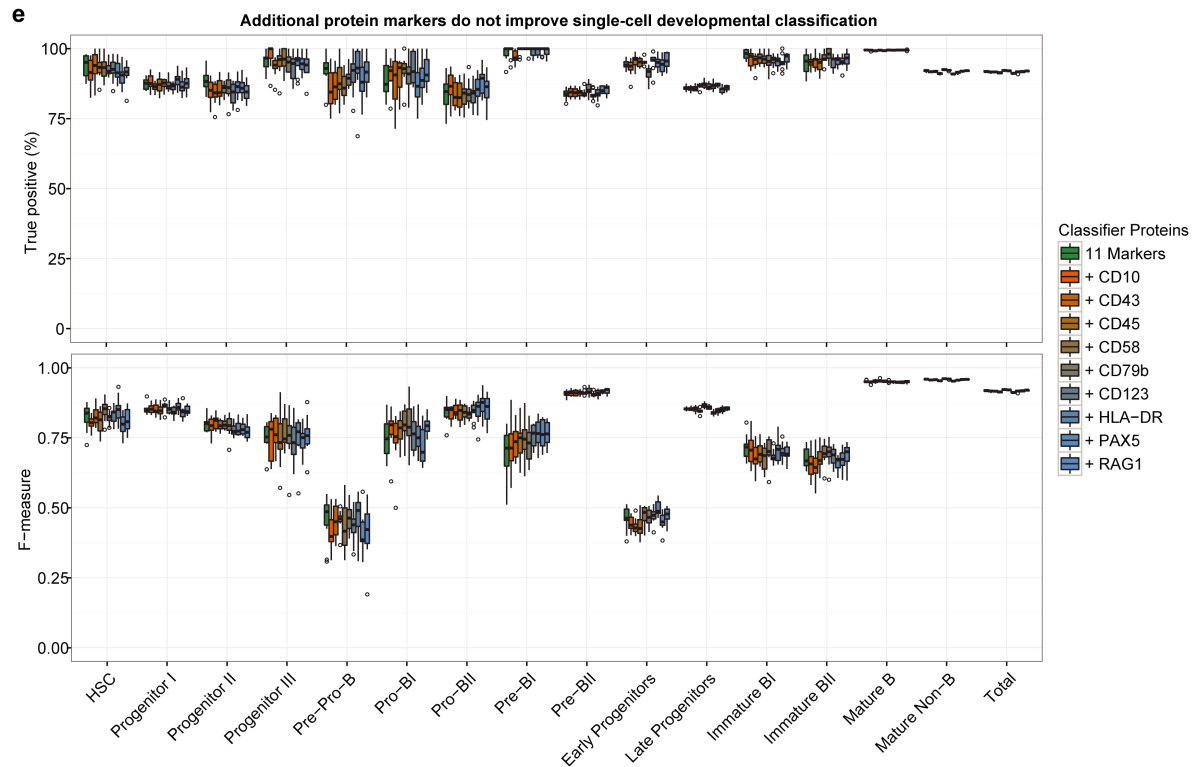

**Supplementary Figure 2. Optimization of single-cell developmental classifier.** **(a)** Single-cell developmental classification assigns a given cell to its most similar healthy population based on the shortest Mahalanobis distance. Mahalanobis distance takes into account the center of a given population as well as its variation in high-dimensional space (covariance matrix). Thus, a cell with the same Euclidean distance to two populations (*e.g.*, HSC and mature B cells) is closer to that population with higher variation (in this example, mature B cells). **(b)** Schematic of single-cell developmental classifier validation. Cells from healthy samples were averaged into an “average healthy”, and then 10-fold cross-validation was performed to assess developmental classifier performance in (c-e). **(c)** Heatmap demonstrating effect of misclassification in healthy controls. In rare cases when the developmental classifier misclassified a cell, it was most often assigned to a nearby population. **(d)** Optimization of distance metric for developmental classifier using true positive rate (left) or F-measure (right). **(e)** Optimization of proteins used for cell assignment. Addition of individual markers does not improve either true positive rate (top) or F-measure (bottom) over the original 11 developmental proteins. Box plots in (d) and (e) show 10 predicted (via cross-validation) values from 4 pooled healthy donors; box is defined by the first and third quartiles, band inside shows the median, whiskers show 1.5x interquartile range, and circles show outliers.

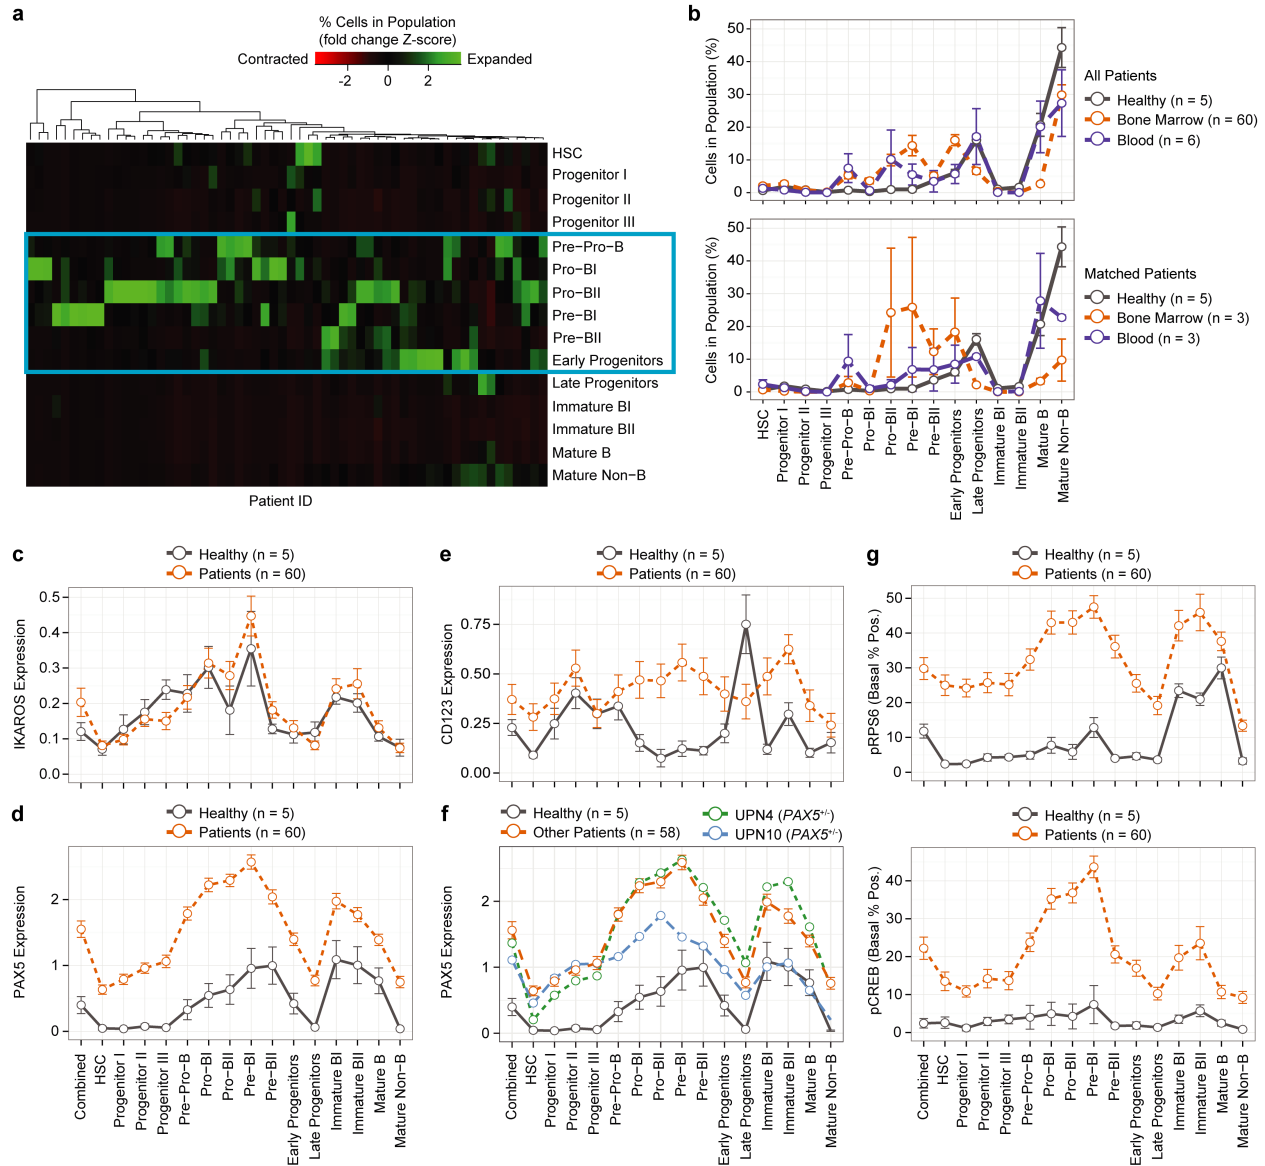

**Supplementary Figure 3. BCP-ALL viewed through the ‘lens’ of normal B-cell development.** (a) Heatmap demonstrates developmental classification of each of 60 primary BCP-ALL diagnostic samples (frequencies of cells in each developmental fraction normalized to an average of healthy bone marrow controls; Z-scores for each patient are shown; columns are hierarchically clustered data from individual patients). Blue box indicates area of shared expansion across most samples. (b) Comparison of developmental classification of bone marrow and peripheral blood samples obtained at diagnosis (all patients, top; matched samples

when available from the same patient, bottom). **(c-e)** Mean arsinh-transformed expression of IKAROS (c), PAX5 (d), and CD123 (e) on healthy bone marrow (grey) vs. classified leukemia (orange) populations. **(f)** Mean arsinh-transformed expression of PAX5 in two patients with known heterozygous deletions in *PAX5*: UPN4 (exons 2-6) and UPN10 (exons 1-10). The anti-PAX5 antibody used for mass cytometry was raised against the portion of the protein encoded by exons 5-7. PAX5 expression in bone marrow from 5 healthy donors (grey) and in other BCP-ALL patients (orange) is shown for reference. **(g)** Percentages of cells positive for pRPS6 (top) and pCREB (bottom) in healthy bone marrow vs. classified leukemia populations. Graphs in (b-g) show mean  $\pm$  s.e.m. for all available diagnostic samples. "Combined" in (c-g) denotes expression in all cells without developmental classification.

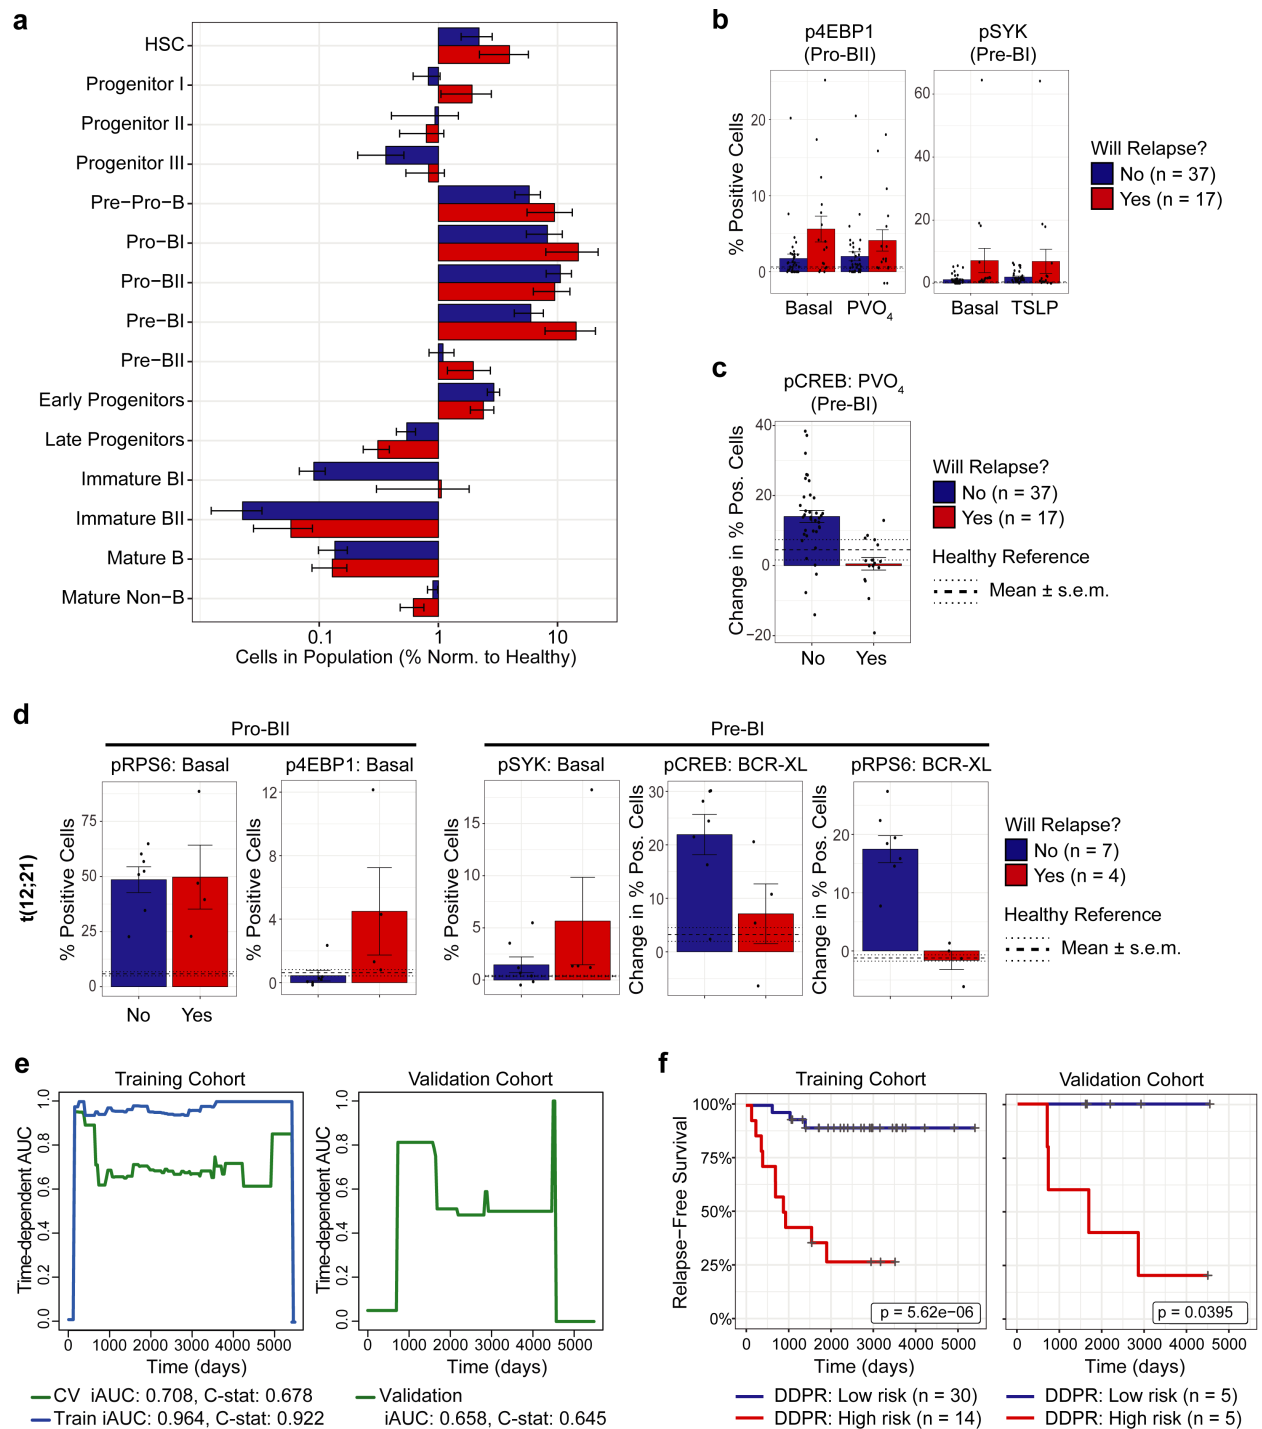

**Supplementary Figure 4. Cellular features at diagnostic for patients who either would, or would not go on to relapse. (a)** Developmental classification of diagnostic bone marrow samples binned by the last documented relapse status. Patients who would go on to relapse are shown in red ( $n = 17$ ), patients who would remain in continuous remission are in blue ( $n = 37$ ).

There are no significant differences in the frequencies of classified populations between groups (unpaired two-tailed Welch's *t* test with Bonferroni correction for multiple comparisons). **(b)** Bar plots of basal and stimulated levels of activated signaling proteins identified by DDPR: p4EBP1 in pro-BII in response to pervanadate (left) and pSYK in pre-BI in response to TSLP (right). **(c)** A bar plot of an additional cellular feature identified by DDPR: pCREB in pre-BI in response to pervanadate. Bar plots in (a-c) show mean  $\pm$  s.e.m. for 54 patients with  $\geq 3$  years of follow-up; where indicated, dashed lines show mean levels in the corresponding developmental populations within healthy bone marrow aspirates of five healthy donors; dotted lines indicate one standard error. **(d)** Key DDPR features for all patients bearing the same single prognostic genetic translocation of chromosomes 12;21 ( $n = 11$ ) are shown as bar plots (mean  $\pm$  s.e.m). **(e)** Time-dependent AUC curves showing performance for relapse prediction in the training (left; CV test: green, overall training fit: blue) and validation (right) cohorts using bulk leukemic blast data without developmental classification. Integrated dynamic/cumulative AUC (iAUC) and C-statistic (C-stat) summary measures are shown for each curve. **(f)** Kaplan-Meier analysis of relapse-free survival in training (left; based on pre-validated relative risk) and validation (right; based on predicted relative risk) cohorts stratified by DDPR risk group (see Methods). RFS estimates with standard error, number of patients at risk, and p-values for both groups at 5 and 7 years are as follows: (left) training cohort: 5 years, low risk ( $n = 20$ )  $89.4 \pm 5.8\%$  vs. high risk ( $n = 4$ )  $35.7 \pm 12.8\%$ ,  $p = 6.7 \times 10^{-3}$ ; 7 years, low risk ( $n = 14$ )  $89.4 \pm 5.8\%$  vs. high risk ( $n = 3$ )  $26.8 \pm 12.3\%$ ,  $p = 7.4 \times 10^{-5}$ ; (right) validation cohort: 5 years, low risk ( $n = 3$ )  $100.0 \pm 0.0\%$  vs. high risk ( $n = 2$ )  $40.0 \pm 21.9\%$ ,  $p = 0.20$ ; 7 years, low risk ( $n = 2$ )  $100.0 \pm 0.0\%$  vs. high risk ( $n = 2$ )  $40.0 \pm 21.9\%$ ,  $p = 0.063$ . P-values were calculated using the log-rank test. CV, cross-validation; TSLP, thymic stromal lymphopoietin;  $PVO_4$ , pervanadate;  $t(12;21)$ , translocation  $t(12;21)(p13;q22)$  *ETV6/RUNX1*.

**a**

|                                             | NCI Risk + DDPR                 | MRD Risk + DDPR                 | Final Risk + DDPR               |
|---------------------------------------------|---------------------------------|---------------------------------|---------------------------------|
| Integrated Discrimination Improvement Index | 0.403 (0.097 - 0.618) p = 0.020 | 0.345 (0.003 - 0.593) p = 0.040 | 0.381 (0.028 - 0.640) p = 0.040 |
| Net Reclassification Improvement            | 0.723 (0.089 - 0.873) p = 0.027 | 0.315 (0.022 - 0.579) p = 0.033 | 0.715 (0.030 - 0.900) p = 0.013 |
| Median Improvement                          | 0.375 (0.057 - 0.618) p = 0.013 | 0.313 (0.002 - 0.834) p = 0.020 | 0.697 (0.043 - 0.840) p = 0.020 |

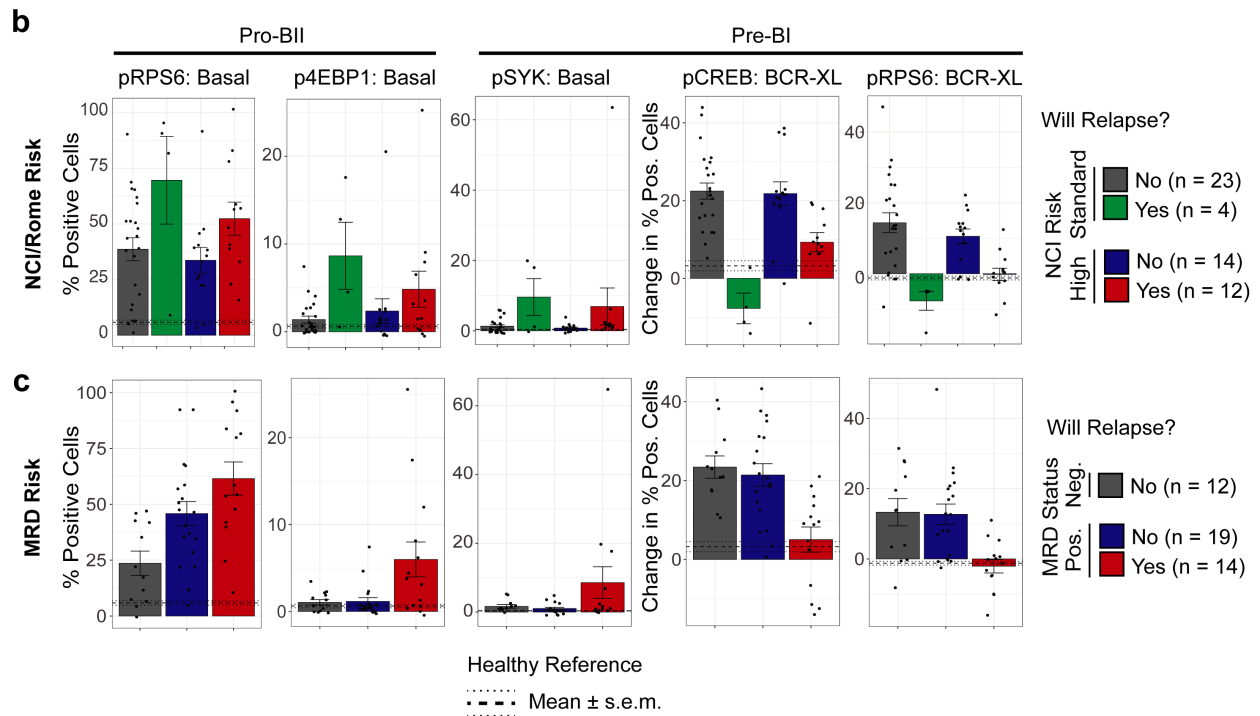

**Supplementary Figure 5. Comparison of DDPR performance to current clinical standards in patient risk stratification. (a)** Improvement in relapse prediction at 5 years resulting from combining DDPR with current risk stratification methods, as assessed by integrated discrimination improvement index, continuous net reclassification improvement, and median improvement for censored time-to-event data. Shown: estimate (95% confidence interval) p-value in n = 53 (NCI risk + DDPR) and n = 45 (MRD risk + DDPR and Final Risk + DDPR) patients with  $\geq 3$  years of follow-up and available risk data. **(b-c)** Key DDPR features when stratified by the last documented relapse status and either NCI/Rome risk group (b, n = 53), or MRD risk (c, n = 45). Bar plots in (b-c) show mean  $\pm$  s.e.m. for all patients with known risk status and  $\geq 3$  years of follow-up. BCR-XL, B-cell receptor crosslink; MRD, minimal residual disease.



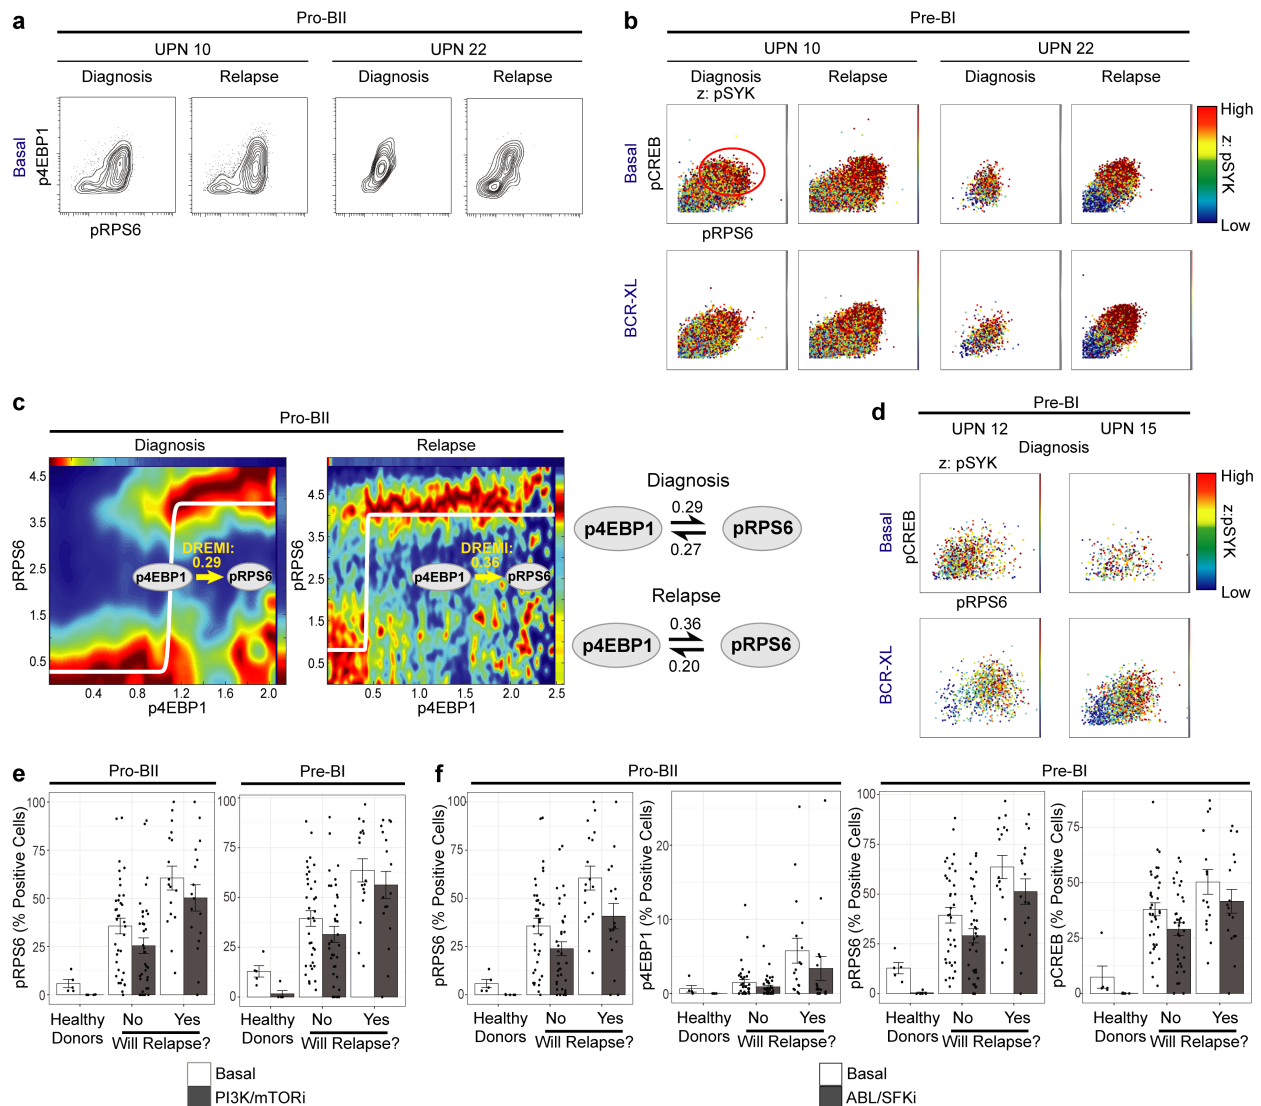

**Supplementary Figure 6. Single-cell analysis and targeting of DDRP functional features at diagnosis and relapse.** (a) Single-cell data demonstrating two DDRP proteins in pro-BII cells in basal state: pRPS6 (X-axis) and p4EBP1 (Y-axis) in 2 representative (of  $n = 7$ ) diagnosis-relapse pairs. (b) Single-cell data demonstrating three DDRP proteins in pre-BI cells in basal state (top) and in response to BCR crosslinking (BCR-XL; bottom): pRPS6 (X-axis), pCREB (Y-axis), and pSYK (Z-axis) in two representative diagnosis-relapse pairs. (c) Same as (b), but for two representative diagnostic samples from  $n = 37$  patients who did not relapse. (d) DREMI analysis and DREVI visualization for DDRP features in pro-BII cells. Up to 5,000 cells from

*matched* diagnosis-relapse pairs (n = 7) were sampled and pooled prior to analysis. Left: Estimated conditional density functions for p4EBP1→pRPS6 at diagnosis and relapse; sigmoidal response functions were fitted to each plot. Right: Quantification for strengths of pairwise signaling relationships within the network formed by p4EBP1 and pRPS6 in pro-BII cells from paired diagnosis-relapse patient samples. **(e)** Response of DDR features to short-term *ex vivo* treatment (as in Supplementary Table 3) in healthy donors (n = 5) or diagnostic samples (no relapse: n = 37, relapse: n = 17): effects of a dual PI3K and mTOR inhibitor (PI3K/mTORi) BEZ235 on the frequencies of pRPS6+ pro-BII and pre-BI cells. **(f)** Effects of a dual BCR-ABL and SRC family kinase inhibitor (ABL/SFKi) dasatinib on frequencies of pRPS6+ and p4EBP1+ pro-BII cells and on frequencies of pRPS6+ and pCREB+ pre-BI cells in healthy donors (n = 5) or diagnostic samples (no relapse: n = 37, relapse: n = 17).

Supplementary Items. Related to Methods.

Supplementary Table 1. Clinical, cytogenetic, and outcome data for the BCP-ALL patient cohort.

| Patient ID* | Gender | Age at Diagnosis | WBC Count (Cells/ $\mu$ L) | Prognostic Translocations | Treatment Protocol | Final Risk   | MRD Risk     | NCI/Rome Risk | Date of Diagnosis | Relapse Status <sup>§</sup> | Time to Relapse (Days) | Type of Relapse <sup>#</sup> | CCR (Days) | Cohort     | DDPR | Risk |
|-------------|--------|------------------|----------------------------|---------------------------|--------------------|--------------|--------------|---------------|-------------------|-----------------------------|------------------------|------------------------------|------------|------------|------|------|
| UPN1        | Male   | 2                | 44100                      | Negative                  | AIEOP2000          | Intermediate | Intermediate | Standard      | 10/23/00          | Yes <sup>M</sup>            | 1043                   | Early                        | NA         | Training   | Low  | Low  |
| UPN2        | Male   | 2                | 36650                      | t(1;19)                   | AIEOP2000          | Intermediate | Intermediate | Standard      | 7/31/01           | No                          | NA                     | NA                           | 5406       | Training   | Low  | Low  |
| UPN3        | Female | 1                | 49250                      | Negative                  | AIEOP2000          | Standard     | Standard     | Standard      | 12/2/02           | No                          | NA                     | NA                           | 4917       | Training   | Low  | Low  |
| UPN4        | Male   | 2                | 33000                      | t(12;21)                  | AIEOP2000          | Standard     | Standard     | Standard      | 12/16/03          | No                          | NA                     | NA                           | 4538       | Validation | Low  | Low  |
| UPN5        | Female | 2                | 150000                     | Negative                  | AIEOP2000          | Standard     | Standard     | High          | 2/2/04            | No                          | NA                     | NA                           | 4490       | Validation | High | High |
| UPN6        | Female | 5                | 113000                     | t(12;21)                  | AIEOP2000          | Intermediate | Intermediate | High          | 10/29/04          | No                          | NA                     | NA                           | 4220       | Training   | Low  | Low  |
| UPN7        | Male   | 14               | 230000                     | t(9;22)                   | AIEOP2000          | High         | Intermediate | High          | 2/25/05           | Yes                         | 136                    | Very early                   | NA         | Training   | High | High |
| UPN8        | Female | 3                | 120000                     | t(12;21)                  | AIEOP2000          | Intermediate | Intermediate | High          | 4/1/05            | Yes                         | 364                    | Very early                   | NA         | Training   | High | High |
| UPN9        | Male   | 5                | 88670                      | Negative                  | AIEOP2000          | High         | High         | High          | 5/19/05           | Yes                         | 237                    | Very early                   | NA         | Training   | High | High |
| UPN10       | Female | 5                | 23520                      | t(12;21)                  | AIEOP2000          | Intermediate | Intermediate | Standard      | 2/20/06           | Yes <sup>M</sup>            | 886                    | Early                        | NA         | Training   | High | High |
| UPN11       | Female | 15               | 14100                      | t(12;21)                  | AIEOP2000          | Intermediate | Intermediate | High          | 4/6/06            | No                          | NA                     | NA                           | 3696       | Training   | Low  | Low  |
| UPN12       | Male   | 6                | 48820                      | Negative                  | AIEOP2000          | Standard     | Standard     | Standard      | 8/16/06           | No                          | NA                     | NA                           | 3564       | Training   | Low  | Low  |
| UPN13       | Female | 2                | 21270                      | t(1;19)                   | AIEOP2000          | Standard     | Standard     | Standard      | 9/4/06            | No                          | NA                     | NA                           | 3545       | Training   | Low  | Low  |
| UPN14       | Male   | 2                | 53580                      | t(12;21)                  | AIEOP2000          | Intermediate | Intermediate | High          | 11/21/06          | Yes                         | 2848                   | Late                         | NA         | Validation | High | High |
| UPN15       | Male   | 4                | 44730                      | t(12;21)                  | AIEOP2000          | Intermediate | Intermediate | Standard      | 11/29/06          | No                          | NA                     | NA                           | 3459       | Training   | Low  | Low  |
| UPN16       | Male   | 12               | 11500                      | Negative                  | AIEOP2000          | Intermediate | Intermediate | High          | 1/21/06           | No                          | NA                     | NA                           | 3771       | Training   | Low  | Low  |
| UPN17       | Male   | 8                | 35830                      | Negative                  | AIEOP2000          | Standard     | Intermediate | Standard      | 9/6/07            | No                          | NA                     | NA                           | 3178       | Training   | High | High |
| UPN18       | Male   | 5                | 2490                       | t(12;21)                  | AIEOP2000          | Intermediate | Intermediate | Standard      | 4/9/08            | No                          | NA                     | NA                           | 2962       | Training   | Low  | Low  |
| UPN19       | Female | 3                | 20300                      | Negative                  | AIEOP2000          | Standard     | Standard     | Standard      | 4/18/08           | No                          | NA                     | NA                           | 2953       | Training   | High | High |
| UPN20       | Male   | 3                | 34200                      | Negative                  | AIEOP2000          | Intermediate | Standard     | Standard      | 5/30/08           | No                          | NA                     | NA                           | 2911       | Validation | Low  | Low  |
| UPN21       | Male   | 2                | 116000                     | t(12;21)                  | AIEOP2000          | Standard     | Intermediate | High          | 6/9/08            | Yes                         | 1907                   | Late                         | NA         | Training   | High | High |
| UPN22       | Male   | 6                | 6220                       | Negative                  | AIEOP2000          | Intermediate | Intermediate | Standard      | 8/7/08            | Yes <sup>M</sup>            | 1552                   | Late                         | NA         | Training   | High | High |
| UPN23       | Female | 2                | 21700                      | Negative                  | AIEOP2000          | Intermediate | Standard     | Standard      | 5/22/08           | No                          | NA                     | NA                           | 2919       | Training   | Low  | Low  |
| UPN24       | Female | 3                | 30680                      | Negative                  | AIEOP2000          | Intermediate | Intermediate | Standard      | 12/11/08          | No                          | NA                     | NA                           | 2716       | Training   | Low  | Low  |
| UPN25       | Female | 15               | 257000                     | Negative                  | AIEOP2000          | Intermediate | Intermediate | High          | 12/17/08          | Yes                         | 698                    | Early                        | NA         | Training   | High | High |
| UPN26       | Male   | 13               | 29200                      | Negative                  | AIEOP2000          | Intermediate | Intermediate | High          | 1/15/09           | Yes                         | 699                    | Early                        | NA         | Training   | High | High |
| UPN27       | Male   | 2                | 27970                      | Negative                  | AIEOP2000          | Standard     | Intermediate | Standard      | 6/8/09            | No                          | NA                     | NA                           | 2537       | Training   | Low  | Low  |
| UPN28       | Female | 4                | 36700                      | t(1;19)                   | AIEOP2000          | Intermediate | Standard     | Standard      | 10/19/09          | No                          | NA                     | NA                           | 2404       | Training   | Low  | Low  |
| UPN29       | Male   | 10               | 11610                      | Negative                  | AIEOP2000          | Intermediate | Intermediate | High          | 1/18/10           | No                          | NA                     | NA                           | 2313       | Training   | Low  | Low  |
| UPN30       | Male   | 10               | 21750                      | Negative                  | AIEOP2000          | Intermediate | Intermediate | High          | 5/25/10           | No                          | NA                     | NA                           | 2186       | Validation | Low  | Low  |
| UPN31       | Female | 3                | 10100                      | t(1;19)                   | AIEOP2000          | Standard     | Standard     | Standard      | 9/11/10           | No                          | NA                     | NA                           | 2077       | Training   | Low  | Low  |
| UPN35       | Male   | 13               | 41800                      | Negative                  | AIEOP2000          | Intermediate | Intermediate | High          | 11/8/10           | Yes <sup>M</sup>            | 624                    | Early                        | NA         | Training   | Low  | Low  |
| UPN45       | Female | 6                | 59910                      | Negative                  | AIEOP2000          | Intermediate | Intermediate | High          | 9/8/06            | Yes <sup>M</sup>            | 700                    | Early                        | NA         | Validation | High | High |
| UPN47       | Male   | 15               | 1870                       | CRLF2r                    | AIEOP2009          | High         | High         | High          | 12/5/11           | Yes                         | 395                    | Very early                   | NA         | Training   | High | High |
| UPN48       | Male   | 12               | 193750                     | CRLF2r                    | AIEOP2009          | Intermediate | Intermediate | High          | 10/18/10          | No                          | NA                     | NA                           | 2229       | Training   | Low  | Low  |
| UPN49       | Female | 4                | 15910                      | CRLF2r                    | AIEOP2009          | High         | Intermediate | Standard      | 11/21/13          | No                          | NA                     | NA                           | 1099       | Training   | Low  | Low  |
| UPN50       | Female | 17               | 5800                       | CRLF2r                    | AIEOP2009          | Standard     | Standard     | High          | 1/13/13           | No                          | NA                     | NA                           | 1411       | Training   | Low  | Low  |
| UPN51       | Male   | 2                | 23940                      | CRLF2r                    | AIEOP2009          | Standard     | Standard     | Standard      | 7/5/12            | No                          | NA                     | NA                           | 1603       | Validation | Low  | Low  |
| UPN52       | Female | 12               | 53640                      | CRLF2r                    | AIEOP2009          | High         | Intermediate | High          | 8/23/12           | No                          | NA                     | NA                           | 1554       | Training   | High | High |
| UPN53       | Female | 6                | 4200                       | t(12;21)                  | AIEOP2009          | Intermediate | Intermediate | Standard      | 8/3/11            | No                          | NA                     | NA                           | 1940       | Training   | Low  | Low  |
| UPN54       | Male   | 4                | 12650                      | t(12;21)                  | AIEOP2009          | High         | High         | Standard      | 2/29/12           | No                          | NA                     | NA                           | 1730       | Training   | Low  | Low  |
| UPN55       | Female | 4                | 25030                      | Negative                  | AIEOP2009          | High         | High         | Standard      | 3/15/12           | No                          | NA                     | NA                           | 1715       | Training   | Low  | Low  |
| UPN56       | Female | 4                | 34800                      | Negative                  | AIEOP2009          | Intermediate | Intermediate | Standard      | 6/5/12            | Yes                         | 938                    | Early                        | NA         | Training   | High | High |
| UPN57       | Female | 2                | 21950                      | Negative                  | AIEOP2009          | Intermediate | Intermediate | Standard      | 5/29/12           | No                          | NA                     | NA                           | 1640       | Validation | Low  | Low  |
| UPN58       | Female | 16               | 6110                       | Negative                  | AIEOP2009          | Intermediate | Intermediate | High          | 3/26/13           | No                          | NA                     | NA                           | 1339       | Training   | Low  | Low  |
| UPN60       | Female | 1                | 34580                      | t(12;21)                  | AIEOP2009          | Intermediate | Intermediate | Standard      | 6/17/13           | NA                          | NA                     | NA                           | NA         | NA         | NA   | NA   |
| UPN62       | Male   | 1                | 20200                      | Negative                  | AIEOP2009          | Intermediate | Intermediate | Standard      | 4/2/14            | NA                          | NA                     | NA                           | NA         | NA         | NA   | NA   |
| UPN63       | Male   | 2                | 18130                      | t(12;21)                  | AIEOP2009          | Intermediate | Intermediate | Standard      | 7/10/14           | NA                          | NA                     | NA                           | NA         | NA         | NA   | NA   |
| UPN67       | Male   | 17               | 166370                     | CRLF2r                    | AIEOP2009          | High         | High         | High          | 2/19/15           | NA                          | NA                     | NA                           | NA         | NA         | NA   | NA   |
| UPN68       | Female | 4                | 1660                       | CRLF2r                    | AIEOP2009          | Intermediate | Intermediate | Standard      | 10/10/14          | NA                          | NA                     | NA                           | NA         | NA         | NA   | NA   |
| UPN69       | Male   | 4                | 5890                       | CRLF2r                    | AIEOP2009          | High         | Intermediate | Standard      | 5/6/15            | NA                          | NA                     | NA                           | NA         | NA         | NA   | NA   |
| UPN90       | Male   | 7                | NA                         | t(9;22)                   | AALL0031           | NA           | NA           | NA            | 10/1/04           | Yes <sup>M</sup>            | 1400                   | Late                         | NA         | Training   | Low  | Low  |
| UPN91       | Male   | 18               | 250000                     | t(9;22)                   | AALL622            | NA           | NA           | High          | 4/6/08            | No                          | NA                     | NA                           | 2991       | Training   | Low  | Low  |
| UPN92       | Male   | 4                | 49800                      | t(9;22)                   | AALL0031           | NA           | NA           | Standard      | 4/1/08            | No                          | NA                     | NA                           | 3163       | Training   | Low  | Low  |
| UPN93       | Female | 14               | 45000                      | t(9;22)                   | AALL1131           | NA           | NA           | High          | 3/26/14           | No                          | NA                     | NA                           | 1073       | Training   | Low  | Low  |
| UPN94       | Male   | 8                | 143000                     | t(9;22)                   | AALL1131           | NA           | NA           | High          | 4/11/14           | Yes                         | 725                    | Early                        | NA         | Validation | High | High |
| UPN95       | Male   | 15               | 4                          | t(9;22)                   | AALL0622           | NA           | NA           | High          | 4/27/09           | Yes <sup>M</sup>            | 1680                   | Late                         | NA         | Validation | High | High |
| UPN96       | Female | 9                | 106000                     | t(9;22)                   | AALL0031           | NA           | NA           | High          | 11/1/06           | No                          | NA                     | NA                           | 3521       | Training   | High | High |
| UPN97       | Female | 4                | 11000                      | t(9;22)                   | AALL1131           | NA           | NA           | Standard      | 12/6/12           | No                          | NA                     | NA                           | 1336       | Training   | Low  | Low  |
| UPN98       | Male   | 15               | 100000                     | t(9;22)                   | AALL0622           | NA           | NA           | High          | 3/23/09           | No                          | NA                     | NA                           | 2790       | Training   | Low  | Low  |

\*Patients UPN1 - UPN69 are from Pediatric Clinic University of Milano-Bicocca (Monza, Italy). Patients UPN90 - UPN98 are from Lucile Packard Children's Hospital at Stanford (Stanford, CA, USA). No reported deaths without relapse occurred in this study.

§Based on the most recent follow-up data. Yes<sup>M</sup> denotes matched diagnosis-relapse bone marrow pairs.

#Clinical definitions for type of relapse:

- Very early:  $\leq$ 18 months / 540 days for this study) from diagnosis.
- Early:  $>$ 18m from diagnosis, but  $\leq$ 6 months from end of therapy (1.5-3.0 years / 540-1100 days for this study).
- Late:  $>$ 6 months from end of therapy (3.0 years / 1100 days for this study).

CCR, continuous complete remission; DDPR, developmentally dependent predictor of relapse; MRD, minimal residual disease; NCI, National Cancer Institute; WBC, white blood cell.

**Supplementary Table 2. Mass cytometry antibody reagents.** Surface and intracellular antibody staining panel clones, lot numbers, suppliers, isotope reporters, and final concentrations used for mass cytometry experiments.

| Protein                 | Clone      | Lot Number | Manufacturer                   | Metal Isotope | Final Concentration (µg/mL) | Surface or Intracellular Stain |
|-------------------------|------------|------------|--------------------------------|---------------|-----------------------------|--------------------------------|
| <b>Phenotype</b>        |            |            |                                |               |                             |                                |
| CD10                    | HI10a      | 6155527    | Biolegend                      | Gd156         | 1                           | S                              |
| CD123                   | 6H6        | B199259    | Biolegend                      | Eu151         | 2                           | S                              |
| CD127                   | HCD127     | B173990    | Biolegend                      | Dy162         | 1                           | S                              |
| CD16                    | 3G8        | B175991    | Biolegend                      | FITC*         | 20                          | S                              |
| CD179a                  | HSL96      | B129864    | Biolegend                      | Sm149         | 1.5                         | I                              |
| CD179b                  | HSL11      | B179047    | Biolegend                      | Gd158         | 1                           | I                              |
| CD19                    | H1B19      | B157781    | Biolegend                      | Nd142         | 2                           | S                              |
| CD20                    | 2H7        | B164952    | Biolegend                      | Sm147         | 2                           | S                              |
| CD22                    | HIB22      | B165323    | Biolegend                      | Nd143         | 2                           | S                              |
| CD235                   | HIR2       | B132247    | Biolegend                      | In113         | 2                           | S                              |
| CD24                    | ML5        | B167884    | Biolegend                      | Gd160         | 2                           | S                              |
| CD3                     | HIT3a      | B151232    | Biolegend                      | Er170         | 0.5                         | S                              |
| CD33                    | HIM3-4     | B183522    | Biolegend                      | FITC*         | 20                          | S                              |
| CD34                    | 8G12       | B163230    | Biolegend                      | Nd148         | 1                           | S                              |
| CD38                    | HIT2       | B170151    | Biolegend                      | Er168         | 2                           | S                              |
| CD43                    | CD43-10G7  | B149905    | Biolegend                      | Er167         | 2                           | S                              |
| CD45                    | HI30       | B159992    | Biolegend                      | In115         | 2                           | S                              |
| CD58                    | TS2-9      | B145718    | Biolegend                      | Tm169         | 2                           | S                              |
| CD61                    | VI-PL2     | B176028    | BD Biosciences                 | In113         | 1                           | S                              |
| CD79b                   | CB3-1      | 4203934    | Biolegend                      | Nd146         | 6                           | S                              |
| HLA-DR                  | L243       | B161762    | Biolegend                      | Yb174         | 2                           | S                              |
| IgHi                    | polyclonal | 10689      | Invitrogen                     | Eu153         | 1                           | I                              |
| IgHs                    | polyclonal | 10689      | Invitrogen                     | Lu175         | 1                           | S                              |
| IKAROS                  | D10E5      | 2          | Cell Signaling Technology      | Nd145         | 4                           | I                              |
| IgL kappa               | MHK-49     | B162243    | Biolegend                      | Sm154         | 2                           | I                              |
| IgL lambda              | MHL-38     | B171739    | Biolegend                      | SM154         | 2                           | I                              |
| PAX5                    | 1H9        | B178991    | eBioscience                    | Ho165         | 1                           | I                              |
| RAG1                    | D36B3      | 3968BF     | Cell Signaling Technology      | Dy163         | 2                           | I                              |
| TdT                     | E17-1519   | 21361      | BD Biosciences                 | Dy164         | 2                           | I                              |
| CRLF2                   | 1B4        | E028811    | eBioscience                    | Dy161         | 1                           | S                              |
| FITC                    | FIT-22     | B174064    | Biolegend                      | Yb171         | 2                           | I                              |
| <b>Functional</b>       |            |            |                                |               |                             |                                |
| AKT (pS473)             | 193H12     | 4060BF     | Cell Signaling Technology      | Tb159         | 1                           | I                              |
| 4EBP1(pT37/T46)         | 236B4      | 18         | Cell Signaling Technology      | Nd144         | 1                           | I                              |
| cPARP                   | F21-852    | 5089576    | BD Biosciences                 | La139         | 1.5                         | I                              |
| CREB (pS133)            | 87G3       | 9198BF     | Cell Signaling Technology      | Yb176         | 0.5                         | I                              |
| ERK1/2 (pT202/pY204)    | D13        | 4370BF     | Cell Signaling Technology      | Yb173         | 0.5                         | I                              |
| Ki-67                   | B56        | 3305519    | BD Biosciences                 | Sm152         | 2                           | I                              |
| IKAROS (pS63)           | STA9       | 1          | Epitomics (made for Nolan lab) | Gd155         | 2                           | I                              |
| PLCg2 (pY759)           | K86-689.37 | 26057      | BD Biosciences                 | Pr141         | 1                           | I                              |
| RPS6 (pS235/pS236)      | N7-548     | 4044686    | BD Biosciences                 | Yb172         | 2                           | I                              |
| STAT5 (pY694)           | 47         | 4044688    | BD Biosciences                 | Nd150         | 1                           | I                              |
| ZAP70/SYK (pY319/pY352) | 17a        | 85582      | BD Biosciences                 | Er166         | 2                           | I                              |

\*These were commercial FITC-conjugated antibodies; an anti-FITC metal-conjugated (Yb171) antibody was used as secondary reporter.

**Supplementary Table 3. Human marrow perturbations.** Stimulation conditions for mass cytometry experiments. Final concentrations are for approximately 1 to 5 million cells in 1 mL volume for the indicated duration.

| Perturbation  | Manufacturer      | Final Concentration | Duration   |
|---------------|-------------------|---------------------|------------|
| Basal         | ----              | ----                | ----       |
| Pervanadate*  | ----              | 125 µM              | 15 minutes |
| IL-7          | BD Biosciences    | 20 ng/mL            | 15 minutes |
| BCR Crosslink | Invitrogen        | Anti-IgM 4 µg/mL    | 5 minutes  |
|               | MD Biomedicals    | H2O2 3.3 mM         |            |
| TSLP          | R&D systems       | 25 ng/mL            | 15 minutes |
| Dasatinib     | LC Laboratories   | 100 nM              | 30 minutes |
| BEZ-235       | Selleck Chemicals | 1 µM                | 30 minutes |
| Tofacitinib   | Selleck Chemicals | 100 nM              | 30 minutes |

\*Made in-house from 200 mM sodium orthovanadate (EMD Millipore) dissolved in PBS containing 53 mM H<sub>2</sub>O<sub>2</sub>.

**Supplementary Table 4. Targeted genetic analysis for selected patients.**

| Patient ID | Genetic Status* |               |                     |                     |                    |             |            |            |                   |
|------------|-----------------|---------------|---------------------|---------------------|--------------------|-------------|------------|------------|-------------------|
|            | <i>IKZF1</i>    | <i>CRLF2r</i> | <i>CDK2A/B</i>      | <i>PAX5</i>         | <i>ETV6</i>        | <i>BTG1</i> | <i>RB1</i> | <i>ERG</i> | <i>JAK2</i>       |
| UPN4       | WT              | WT            | deletion            | del (ex 2-6)        | deletion           | WT          | WT         | WT         |                   |
| UPN5       | WT              | WT            | WT                  | WT                  | gain               | gain        | WT         | WT         |                   |
| UPN9       | WT              | WT            | deletion            | WT                  | deletion           | WT          | deletion   | WT         |                   |
| UPN10      | WT              | WT            | del (homozygous)    | del (ex 1-10, het.) | WT                 | WT          | WT         | WT         |                   |
| UPN22      | WT              | WT            | WT                  | WT                  | WT                 | WT          | WT         | WT         |                   |
| UPN47      | del (ex 2-7)    | P2RY8-CRLF2   | del (homozygous)    | WT                  | wt                 | WT          | WT         |            | L681- I682 ins GL |
| UPN48      |                 | IGH@CRLF2     |                     |                     |                    |             |            |            | R683G             |
| UPN49      |                 | P2RY8-CRLF2   |                     |                     |                    |             |            |            | WT                |
| UPN50      | del (ex 2-3)    | P2RY8-CRLF2   | deleted             | del ex 1 and 5-6    | WT                 | WT          | WT         |            | WT                |
| UPN51      | WT              | P2RY8-CRLF2   | WT                  | WT                  | WT                 | WT          | WT         |            | WT                |
| UPN52      | WT              |               | WT                  | WT                  | WT                 | WT          | WT         |            | WT                |
| UPN53      | del (ex 2-3)    | WT            | deleted             | WT                  | WT                 | WT          | WT         |            | WT                |
| UPN54      | WT              | WT            | WT                  | WT                  | deleted            | del ex 2    | WT         |            | WT                |
| UPN55      | WT              | WT            | WT                  | WT                  | del (ex 5-6, hom.) | WT          | WT         |            | WT                |
| UPN56      | deleted         | WT            | deleted (all chr 9) | del (ex 7-10)       | WT                 | WT          | WT         |            | WT                |
| UPN57      | WT              | WT            | WT                  | WT                  | WT                 | WT          | WT         |            | WT                |
| UPN58      | WT              | WT            | WT                  | del (ex 2-10)       | del (ex 2)         | WT          | deleted    |            | WT                |
| UPN66      | WT              | P2RY8-CRLF2   | deletion            | WT                  | WT                 | del (ex5)   | WT         |            | WT                |
| UPN67      |                 | P2RY8-CRLF2   |                     |                     |                    |             |            |            | WT                |
| UPN68      | WT              | IGH@CRLF2     | WT                  | del ex 5            | WT                 | WT          | WT         |            | WT                |
| UPN69      |                 | P2RY8-CRLF2   |                     |                     |                    |             |            |            | WT                |

\*Copy number and mutation status for *IKZF1*, *CDKN2A/B*, *PAX5*, *ERG*, *BTG1*, *ETV6*, and *RB1*, as well as the presence of *P2RY8-CRLF2* gene fusion, were assessed by multiplex ligation-dependent probe amplification (MLPA); *JAK2* mutations were identified by high-resolution melt (HRM); *IGH@CRLF2* rearrangement was tested by fluorescent *in situ* hybridization (FISH); genetic analysis has not been performed for cells shown in grey. WT, wild-type.

**Supplementary Table 5. Cellular features within each developmental fraction extracted from patient mass cytometry data.**

This table is too large to display and is provided as a supplementary CSV file.

**Supplementary Table 6. Lineage depletion antibodies.** Non-B cell lineage depletion antibody staining panel clones, suppliers, and staining concentrations, as used for healthy controls.

| Antibody | Clone  | Manufacturer | Final Concentration |
|----------|--------|--------------|---------------------|
| CD16     | 3G8    | Biologend    | 2 µg/mL             |
| CD14     | HCD-14 | Biologend    | 2 µg/mL             |
| CD11c    | 3.9    | Biologend    | 2 µg/mL             |
| CD56     | HCD56  | Biologend    | 2 µg/mL             |
| CD3      | UCHT1  | Biologend    | 2 µg/mL             |
| CD66     | G10F5  | Biologend    | 2 µg/mL             |

**Supplementary Table 7. Feature scaling parameters and final DDPR coefficients.** These parameters are needed to apply the Developmentally Dependent Predictor of Relapse (DDPR) model to new patient data\*.

Formula for the DDPR risk group assignment:

$$\text{Relative Risk (RR)} = e^{\beta_1 \cdot x_1 + \beta_2 \cdot x_2 + \beta_3 \cdot x_3 + \beta_4 \cdot x_4 + \beta_5 \cdot x_5 + \beta_6 \cdot x_6}$$

where features  $x_1 - x_6$  have been scaled to mean ( $\mu_1 - \mu_6$ ) and s.d. ( $\sigma_1 - \sigma_6$ ) from the original training cohort:

| Feature                                                                  | Mean                   | S.D.                     | Coefficient              |
|--------------------------------------------------------------------------|------------------------|--------------------------|--------------------------|
| $x_1$ = % pRPS6+ pro-BII cells in basal state                            | $\mu_1 = 42.383637404$ | $\sigma_1 = 3.861958629$ | $\beta_1 = 0.001068559$  |
| $x_2$ = Change in % p4EBP1+ pro-BII cells in response to pervanadate     | $\mu_2 = -0.200045619$ | $\sigma_2 = 0.244233419$ | $\beta_2 = -0.037058968$ |
| $x_3$ = Change in % pSYK+ pre-BI cells in response to TSLP               | $\mu_3 = 0.366274681$  | $\sigma_3 = 0.130263455$ | $\beta_3 = -0.013482758$ |
| $x_4$ = Change in % pRPS6+ pre-BI cells in response to pre-BCR crosslink | $\mu_4 = 7.688111392$  | $\sigma_4 = 1.979755352$ | $\beta_4 = -0.024862815$ |
| $x_5$ = Change in % pCREB+ pre-BI cells in response to pre-BCR crosslink | $\mu_5 = 16.63420474$  | $\sigma_5 = 2.064346649$ | $\beta_5 = -0.011677451$ |
| $x_6$ = Change in % pCREB+ pre-BI cells in response to pervanadate       | $\mu_6 = 10.12094851$  | $\sigma_6 = 1.652814498$ | $\beta_6 = -0.002623108$ |

If  $RR \geq 0.9967361$ , a patient is in **high** DDPR risk group, and in **low** DDPR risk group otherwise.

\*Prior to constructing the DDPR model, all features from BCP-ALL patients with  $\geq 3$  years on follow-up ( $n = 54$ , see Methods and Supplementary Table 5) were scaled to mean = 0 and s.d. = 1 from the training cohort ( $n = 44$ ). The scaling parameters were then applied to the validation cohort ( $n = 10$ ). The same scaling parameters will need to be applied to other new patient samples.
